# Improved Postprandial Glycemic Control With Biphasic Insulin Aspart Relative to Biphasic Insulin Lispro and Biphasic Human Insulin in Patients With Type 2 Diabetes

KJELD HERMANSEN, MD, DMSc  
MICHELE COLOMBO, MD  
HEIDI STORGAARD, MD

ANETTE ØSTERGAARD, MSc PHARM  
KLAUS KØLENDORF, MD  
STEN MADSBAD, MD

**OBJECTIVE** — The rapid-acting insulin analogs aspart and lispro have now been developed in biphasic formulations. This trial compared the postprandial serum glucose control of biphasic insulin aspart 30 (BIAsp 30: 30% aspart, 70% protaminated aspart) with that of biphasic insulin lispro 25 (Mix25: 25% lispro, 75% protaminated lispro) and biphasic human insulin 30 (BHI 30: 30% regular insulin, 70% NPH insulin) in insulin-treated subjects with type 2 diabetes.

**RESEARCH DESIGN AND METHODS** — This was an open-labeled, randomized, single-dose, three-way crossover trial of 61 insulin-treated subjects with type 2 diabetes who had no significant late diabetic complications. BIAsp 30 and Mix25 were injected subcutaneously immediately before a test meal, and BHI 30 was injected 15 min before a test meal. The primary target of analysis was serum glucose excursion 0–5 h after a meal.

**RESULTS** — The postprandial glycemic control with BIAsp 30, as assessed by the 5-h post-meal serum glucose excursion, was superior to that with both BHI 30 and Mix25 ( $16.6 \pm 4.5$  vs.  $20.1 \pm 4.9$  and  $18.9 \pm 6.1$  mmol/l per hour, respectively;  $P < 0.001$  and  $P < 0.05$ ). For BIAsp 30 versus BHI 30, this was supported by a reduced maximum glucose concentration [ $C_{\max(SG)}$ ] ( $-5\%$ ;  $P < 0.05$ ) occurring earlier ( $-13$  min;  $P < 0.01$ ). Furthermore, BIAsp 30 displayed a higher maximum serum insulin concentration ( $+101\%$ ;  $P < 0.001$ ) occurring earlier ( $-55$  min;  $P < 0.001$ ) compared with BHI 30. Compared with Mix25, there was a shorter time to  $C_{\max(SG)}$  ( $-11$  min;  $P < 0.05$ ) after treatment with BIAsp 30.

**CONCLUSIONS** — This trial demonstrates that BIAsp 30 improves postprandial glycemic control compared with both Mix25 and BHI 30 in subjects with type 2 diabetes.

*Diabetes Care* 25:883–888, 2002

Recent studies (1–5), including the Diabetes Control and Complications Trial (DCCT) (1) and the U.K. Prospective Diabetes Study (UKPDS) (4,5), have established the deleterious

role of sustained hyperglycemia in the development and progression of microvascular and macrovascular complications in patients with diabetes. Furthermore, there is increasing evidence that pro-

longed postprandial hyperglycemia makes a major contribution to overall glucose control as well as to the development of late diabetic complications (6–8). Interestingly, analysis of the DECODE (Diabetes Epidemiology: Collaborative Analysis of Diagnostic Criteria in Europe) database, which contains data from >180,000 person-years of accumulated follow-up in populations from various parts of Europe, shows that a high 2-h glucose response to an oral glucose tolerance test is associated with an increased risk of death, independent of fasting blood glucose levels (9,10). Also, the Diabetes Intervention Study (DIS) showed a significant association between postprandial glucose levels and the incidence of myocardial infarction and death rates (11). These findings underline the importance of developing treatments that most effectively improve glycemic control, including suppression of postprandial blood glucose excursions.

Current mealtime treatments with human insulin are not optimal. Rapid-acting insulin analogs such as insulin aspart have been developed to overcome the shortcomings of conventional therapies with human insulin. Insulin aspart (IAsp) is an analog of human insulin in which the amino acid proline, at position B28 on the insulin molecule, has been replaced by aspartic acid. This substitution results in a reduced tendency for self-association, thereby allowing a more rapid absorption from the subcutis. IAsp injected immediately before a meal therefore results in significantly reduced postprandial glucose levels compared with regular insulin (12,13).

As a consequence of their earlier onset and shorter duration of action, it is often necessary to supplement rapid-acting analogs with basal insulin to avoid late postprandial and fasting hyperglycemia (14,15). Premixed formulations of solu-

From the University Department of Endocrinology and Metabolism, Aarhus Amtssygehus, Aarhus, Denmark.

Address correspondence and reprint requests to Kjeld Hermansen, MD, DMSc, University Department of Endocrinology and Metabolism, Aarhus Amtssygehus, Tage Hansens Gade 2, DK-8000 Aarhus. E-mail: kjeld.hermansen@aas.auh.dk.

Received for publication 24 October 2001 and accepted 15 January 2002.

**Abbreviations:** AUC, area under the curve; BHI 30, biphasic human insulin 30; BIAsp 30, biphasic insulin aspart 30; DCCT, Diabetes Control and Complications Trial; DECODE, Diabetes Epidemiology: Collaborative Analysis Of Diagnostic Criteria in Europe; IAsp, insulin aspart; Mix25, biphasic insulin lispro 25; PP, per protocol.

A table elsewhere in this issue shows conventional and Système International (SI) units and conversion factors for many substances.



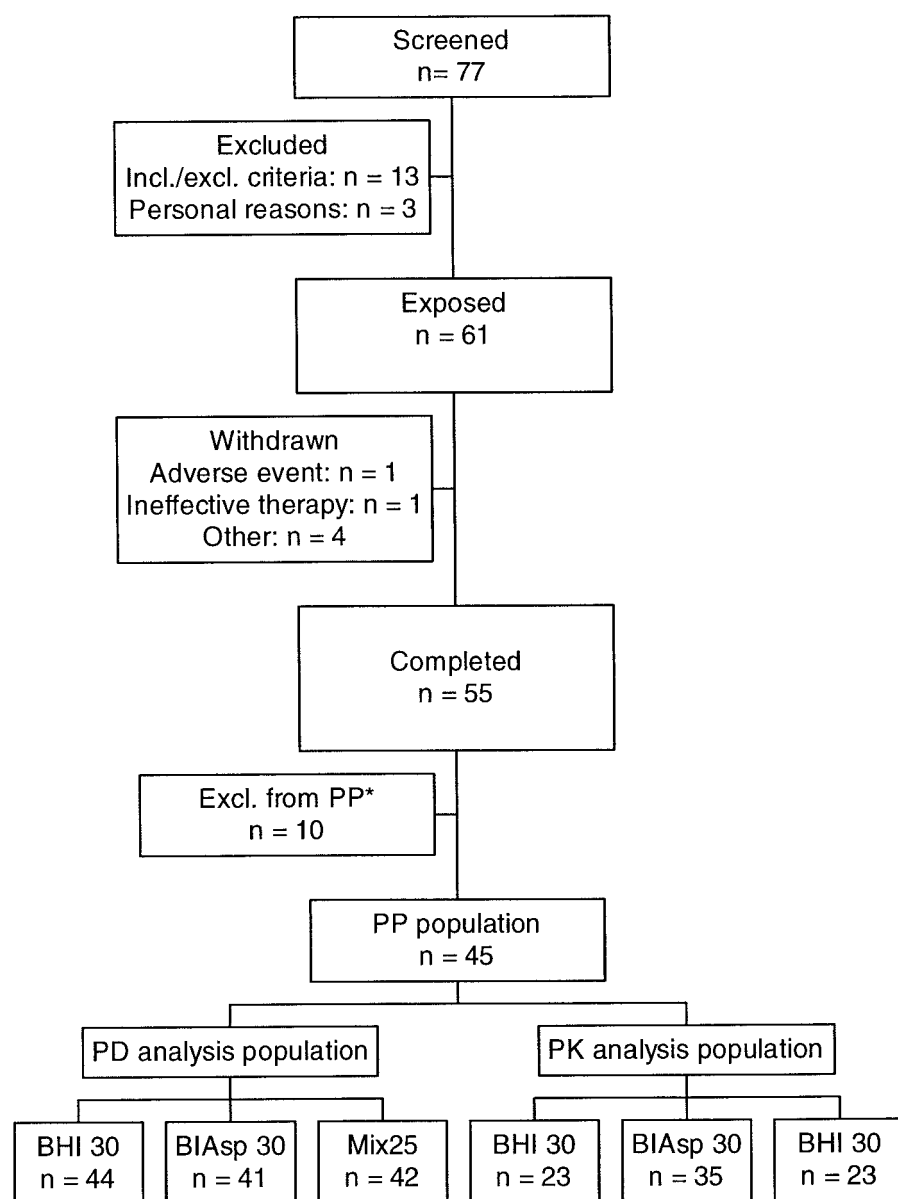

**Figure 1**—Population allocation. \*Subjects excluded from the PP population who violated the protocol or had pharmacodynamic and pharmacokinetic profiles for only one of the trial products.

regarded as missing. Profiles were excluded if more than five values were missing and if baseline values were missing.

### Statistical analyses

The study was designed to have 80% power (53 subjects) to detect a relative difference of 25% between treatments for the postprandial glucose excursion ( $EXC_{0-5\text{ h}(SG)}$ ). All analyses were based on the per-protocol (PP) population, which included all subjects who did not violate the protocol and who had acceptable pharmacodynamic and pharmacokinetic profiles for at least two of

the trial products. End points were analyzed by a two-way ANOVA with treatment as a fixed effect and subject as a random effect, with a 5% level of significance. Except for  $t_{\max(SG)}$  and  $t_{\max(INS)}$ , all analyses were based on log-transformed data. If observations were only available up to 4 h after the meal, the profiles were extrapolated to 5 h by applying the approach of last observation carried forward. If <4 h of data was available, profiles were excluded from the analysis. Statistical analyses were performed using SAS version 6.12 on a UNIX platform (SAS Institute, Cary, NC).

## RESULTS

### Subjects

A total of 61 insulin-treated type 2 diabetic subjects were randomized in the trial: 40 men, 21 women; aged  $60.1 \pm 9.4$  years (range 35–80); BMI  $27.3 \pm 3.6$  kg/m<sup>2</sup> (8.1–32.2), and HbA<sub>1c</sub>  $8.3 \pm 1.1\%$  (5.6–10.5%). Duration of diagnosed type 2 diabetes was  $11.6 \pm 6.4$  years (0.5–23). One subject having BMI of 32.2 kg/m<sup>2</sup> was included in the trial. However, this deviation was considered of minor importance and the subject was therefore included in the analysis. One subject was withdrawn due to a serious adverse event (transient ischemic attack) after treatment with BIAsp 30, which was not related to therapy. One subject withdrew from the trial due to ineffective therapy 28 days after one of the meal tests, in which the subject was treated with Mix25. Four additional subjects withdrew from the trial for personal reasons. Of the 55 subjects who completed the trial, 45 were included in the PP analysis population (Fig. 1).

### Postprandial serum glucose concentration

Mean pretest fasting serum glucose levels obtained were similar between groups (8.4–8.6 mmol/l). Postprandial glucose control, as assessed by serum glucose excursion 0–5 h after the meal ( $EXC_{0-5(SG)}$ ), was significantly superior with BIAsp 30 compared with either BHI 30 or Mix25: 17% lower than with BHI 30 ( $P < 0.001$ ) and 10% lower than with Mix25 ( $P < 0.05$ ) (Fig. 2, Table 1). Glucose excursion was significantly lower during both the early (0–2 h) and the late (2–5 h) postprandial phase with BIAsp 30 than with BHI 30 ( $EXC_{0-2}$ ,  $P < 0.01$ ;  $EXC_{2-5}$ ,  $P < 0.01$ ). Glucose excursion with BIAsp 30 was also significantly lower than with Mix25 during the late postprandial phase ( $P < 0.05$ ) but not during the early phase.  $C_{\max(SG)}$  for BIAsp 30 was significantly lower than that for BHI 30 ( $P < 0.05$ ) but was not different from Mix25. Finally,  $t_{\max(SG)}$  was significantly shorter for BIAsp 30 than for either of the other preparations (13 min shorter than with BHI 30,  $P < 0.01$ ; 11 min shorter than with Mix25,  $P < 0.05$ ) (Table 1).

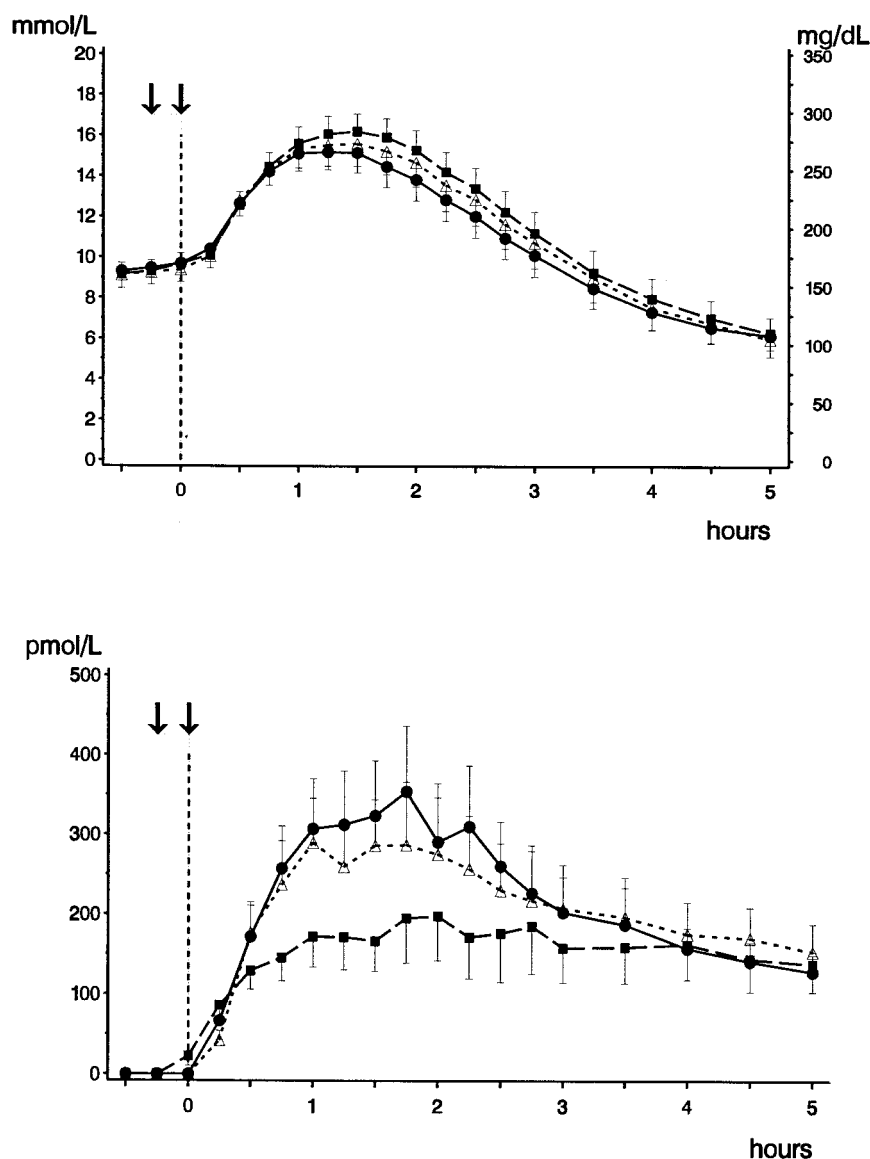

**Figure 2**—Mean postprandial serum glucose (top) and insulin (bottom) profiles for subjects with type 2 diabetes (PP population) after injection of BIAsp 30 (●) and Mix25 (△) immediately before test meal, and BHI 30 15 minutes before test meal (■). Arrows indicate the injection times; vertical dotted line marks the time of meal ingestion. Error bars represent  $2 \times$  standard error of the mean.

### Postprandial serum insulin concentration

A larger  $AUC_{(0-5\text{ h})}$  and an approximately twofold higher  $C_{\max(\text{ins})}$  were seen after injection with BIAsp 30 than after injection with BHI 30 ( $P < 0.001$  for both parameters). The time to  $C_{\max(\text{ins})}$  was 55 min shorter for BIAsp 30 than for BHI 30 ( $P < 0.001$ ). The  $C_{\max(\text{ins})}$  was 12% higher and the  $AUC_{0-5\text{ h}(\text{ins})}$  was 7% higher for BIAsp 30 as compared with Mix25 (Fig. 2), but this did not reach statistical significance (Table 1).

### Safety

One serious adverse event and one non-serious adverse event were reported after treatment with BIAsp 30, whereas two nonserious events were reported with BHI 30. None of the events were evaluated as being related to treatment. Overall, 53 hypoglycemic episodes were reported during study days (23 episodes with BIAsp 30, 11 episodes with BHI 30, and 19 episodes with Mix25). Most were mild (symptoms only, not confirmed by blood glucose measurements) and re-

solved spontaneously. There were very few severe hypoglycemic episodes (requiring third-party intervention) during the trial (two episodes with BIAsp 30, two episodes with BHI 30, five episodes with Mix25), and no clinically significant abnormalities in biochemical or hematological measurements or vital signs.

**CONCLUSIONS**—Glycemic control as measured by  $HbA_{1c}$  does not discriminate between the relative contribution of fasting and postprandial glucose levels, and it is not clear whether therapies that target postprandial glycemia per se have specific benefits compared with other therapies that lower  $HbA_{1c}$ . No prospective studies confirming the clinical relevance of postprandial glycemic control are available (24). Such studies would not be easy to conduct, because it is difficult to distinguish between the benefits of improved postprandial control from overall glucose control. However, postprandial hyperglycemia is now recognized as being associated with the risk of developing microvascular and macrovascular complications in diabetes (7–11,25,26). Both the DCCT (1) and the Kumamoto Study (2,27) targeted postprandial glucose levels as part of their intensive treatment arms to improve overall glucose control as measured by  $HbA_{1c}$  in subjects with type 1 and type 2 diabetes, respectively. In both cases, intensive treatment with meal-time insulin was associated with reductions in microvascular complications. The importance of a high glucose response is further supported by the results of the DECODE epidemiological study, which included data from  $>20,000$  subjects with varying degrees of abnormal glucose homeostasis (ranging from normal to diabetic). In all groups, 2-h blood glucose levels after oral glucose load were shown to be better predictors than fasting glucose levels of cardiovascular disease and death from all causes (9,10).

Although improvements in postprandial glucose control after treatment with BIAsp 30 compared with BHI 30 have previously been reported (17,28), this is the first direct comparison of the two biphasic insulin analog formulations BIAsp 30 and Mix25. The results of this trial show that postprandial glucose concentrations in individuals with type 2 diabetes can be more effectively controlled with BIAsp 30 than with either BHI 30 or Mix25. It should be stressed that the BHI



**Table 1**—Results and ANOVA comparisons of BIAsp 30 (injected at mealtime) with Mix25 (injected at mealtime) and BHI 30 (injected 15 min before mealtime)

| Glucose end point                             | Means $\pm$ SD  | Ratio* between treatments (95% CI) |                       |
|-----------------------------------------------|-----------------|------------------------------------|-----------------------|
|                                               |                 | BIAsp 30 / BHI 30                  | BIAsp 30 / Mix25      |
| <i>Pharmacodynamic end points:</i>            |                 |                                    |                       |
| <i>Glucose excursion</i>                      |                 |                                    |                       |
| EXC <sub>0–5 (SG)</sub> (mmol/l $\times$ h)   |                 |                                    |                       |
| BHI 30                                        | 20.1 $\pm$ 4.9  | 0.83 (0.77; 0.90)†                 |                       |
| BIAsp 30                                      | 16.6 $\pm$ 4.4  |                                    | 0.90 (0.83; 0.98)‡    |
| Mix25                                         | 18.9 $\pm$ 6.1  |                                    |                       |
| EXC <sub>0–2 (SG)</sub> (mmol/l $\times$ h)   |                 |                                    |                       |
| BHI 30                                        | 9.4 $\pm$ 2.7   | 0.81 (0.71; 0.93)§                 |                       |
| BIAsp 30                                      | 7.7 $\pm$ 2.7   |                                    | 0.97 (0.85; 1.11)     |
| Mix25                                         | 8.5 $\pm$ 3.3   |                                    |                       |
| EXC <sub>2–5 (SG)</sub> (mmol/l $\times$ h)   |                 |                                    |                       |
| BHI 30                                        | 10.1 $\pm$ 3.2  | 0.82 (0.72; 0.94)§                 |                       |
| BIAsp 30                                      | 8.3 $\pm$ 2.6   |                                    | 0.88 (0.77; 1.00)‡    |
| Mix25                                         | 9.7 $\pm$ 3.8   |                                    |                       |
| C <sub>max (SG)</sub> (mmol/l)                |                 |                                    |                       |
| BHI 30                                        | 16.7 $\pm$ 2.6  | 0.95 (0.91; 1.00)‡                 |                       |
| BIAsp 30                                      | 15.9 $\pm$ 2.7  |                                    | 0.99 (0.94; 1.04)     |
| Mix25                                         | 16.4 $\pm$ 3.2  |                                    |                       |
| t <sub>max (SG)</sub> (min)                   |                 |                                    |                       |
| BHI 30                                        | 88.0 $\pm$ 26.4 | −13.2 (−22.2; −4.1)§               |                       |
| BIAsp 30                                      | 75.1 $\pm$ 22.2 |                                    | −11.3 (−20.5; −2.11)‡ |
| Mix25                                         | 86.5 $\pm$ 26.9 |                                    |                       |
| <i>Pharmacokinetic end points:</i>            |                 |                                    |                       |
| <i>Insulin</i>                                |                 |                                    |                       |
| AUC <sub>0–5h (ins)</sub> (pmol/l $\times$ h) |                 |                                    |                       |
| BHI 30                                        | 741 $\pm$ 426   | 1.72 (1.40; 2.10)†                 |                       |
| BIAsp 30                                      | 1,079 $\pm$ 535 |                                    | 1.07 (0.90; 1.28)     |
| Mix25                                         | 1,031 $\pm$ 621 |                                    |                       |
| C <sub>max (ins)</sub> (pmol/l)               |                 |                                    |                       |
| BHI 30                                        | 237 $\pm$ 156   | 2.01 (1.64; 2.46)†                 |                       |
| BIAsp 30                                      | 415 $\pm$ 244   |                                    | 1.12 (0.95; 1.34)     |
| Mix25                                         | 360 $\pm$ 211   |                                    |                       |
| t <sub>max (ins)</sub> (min)                  |                 |                                    |                       |
| BHI 30                                        | 169 $\pm$ 71    | −55.3 (−85.0; −25.5)†              |                       |
| BIAsp 30                                      | 115 $\pm$ 59    |                                    | 15.15 (−11.4; 41.7)   |
| Mix25                                         | 100 $\pm$ 41    |                                    |                       |

PK and PD parameter data are means  $\pm$  SD. The ratios and differences (with 95% CIs) refer to ANOVA analyses comparing BIAsp 30 with Mix25 and BHI 30 treatments in the PP population. \*Ratios except for t<sub>max</sub> are difference in minutes; †P < 0.001; ‡P < 0.05; §P < 0.01; ||data obtained from t = –15 to t = 285.

30 was administered 15 min before the meal. It cannot be excluded that administration of the agent 30 min before the meal would have changed the glycemic response to BHI 30 slightly. A more detailed examination of the postprandial serum glucose excursion showed that the late postprandial serum glucose excursion (2–5 h) was significantly lower with BIAsp 30 than Mix25. Whether this difference in glucose excursion between BIAsp 30 and Mix25 is due to the difference in ratios of soluble and protaminated analog, to a difference between the native

analogs, or to a combination of the two is yet to be determined.

Analyses based on the pharmacokinetic profiles showed that maximum serum insulin concentrations were higher and were obtained faster with BIAsp 30 administered immediately before the meal compared with BHI 30 administered 15 min before eating. No significant differences could be demonstrated between BIAsp 30 and Mix25, despite a tendency for higher serum insulin concentrations with BIAsp 30 from 1 to 2.5 h (Fig. 2). These pharmacokinetic

results should be interpreted with caution, because insulin profiles were excluded for several subjects due to hemolyzed blood samples and/or negative derived values (Fig. 1). In addition, the C-peptide corrections require a constant ratio between C-peptide and endogenous insulin, which is only the case in a fasting state. However, due to the crossover design and the fact that the meal test conditions were similar for all treatments, a possible C-peptide correction error must be considered comparable for all three treatments.

The present trial only shows results after a single meal, and limited data are presently available to establish the long-term benefits of twice-daily treatment with biphasic insulin analogs in subjects with type 2 diabetes. Improved postprandial glucose control and similar HbA<sub>1c</sub> values have been shown after 3 months of treatment with BIAsp 30 compared with BHI 30 in type 1 and type 2 diabetic subjects (29). Similar results have been shown for Mix25 in a 6-month randomized trial (18).

In conclusion, BIAsp 30 provides improved postprandial glucose control in type 2 diabetic subjects when compared with Mix25 and BHI 30. Although the clinical relevance of the observed improvement in postprandial glucose control remains to be proven in prospective long-term studies, a treatment modality that tends to normalize the postprandial glycemic responses is considered likely to exert a beneficial impact on the development of long-term diabetic complications and death rates of diabetic subjects (1,5,9–11).

**Acknowledgments**—This study was supported by Novo Nordisk A/S, Bagsværd, Denmark.

Part of this study was presented in abstract form at the 37th annual meeting of the European Association for the Study of Diabetes, Glasgow, U.K., 9–13 September 2001.

## References

1. The Diabetes Control and Complications Trial Research Group: The effect of intensive treatment of diabetes on the development and progression of long-term complications in insulin-dependent diabetes mellitus. *N Engl J Med* 329:977–986, 1993
2. Ohkubo Y, Kishikawa H, Araki E, Miyata T, Isami S, Motoyoshi S, Kojima Y, Furuyoshi N, Shichiri M: Intensive insulin therapy prevents the progression of diabetic microvascular complications in Japanese patients with non-insulin-dependent diabetes mellitus: a randomized prospective 6-year study. *Diabetes Res Clin Pract* 28:103–117, 1995
3. Gaster B, Hirsch IB: The effects of improved glycemic control on complications in type 2 diabetes. *Arch Intern Med* 158:134–140, 1998
4. United Kingdom Prospective Diabetes Study Group: United Kingdom Prospective Diabetes Study 24: a 6-year, randomized, controlled trial comparing sulfonylurea, insulin, and metformin therapy in patients with newly diagnosed type 2 diabetes that could not be controlled with diet therapy: United Kingdom Prospective Diabetes Study Group. *Ann Intern Med* 128:165–175, 1998
5. United Kingdom Prospective Diabetes Study (UKPDS) Group: Intensive blood-glucose control with sulphonylureas or insulin compared with conventional treatment and risk of complications in patients with type 2 diabetes (UKPDS 33). *Lancet* 352:837–853, 1998
6. Monnier L: Is postprandial glucose a neglected cardiovascular risk factor in type 2 diabetes? *Eur J Clin Invest* 30 (Suppl. 2): 3–11, 2000
7. Del Prato S: Post-prandial hyperglycaemia: the necessity for better control. *Int J Clin Pract Suppl* 112:3–8, 2000
8. Ceriello A: The emerging role of postprandial hyperglycaemic spikes in the pathogenesis of diabetic complications. *Diabet Med* 15:188–193, 1998
9. The DECODE Study Group, on behalf of the European Diabetes Epidemiology Group: Glucose tolerance and mortality: comparison of WHO and American Diabetes Association diagnostic criteria, the DECODE study group, European Diabetes Epidemiology Group: Diabetes epidemiology: collaborative analysis of diagnostic criteria in Europe. *Lancet* 354:617–621, 1999
10. The DECODE Study Group, on behalf of the European Diabetes Epidemiology Group: Glucose tolerance and cardiovascular mortality: comparison of fasting and 2-hour diagnostic criteria. *Arch Intern Med* 161:397–405, 2001
11. Hanefeld M, Fischer S, Julius U, Schulze J, Schwanebeck U, Schmechel H, Ziegler HJ, Lindner J: Risk factors for myocardial infarction and death in newly detected NIDDM: the Diabetes Intervention Study, 11-year follow-up. *Diabetologia* 39:1577–1583, 1996
12. Home PD, Barriocanal L, Lindholm A: Comparative pharmacokinetics and pharmacodynamics of the novel rapid-acting insulin analogue, insulin aspart, in healthy volunteers. *Eur J Clin Pharmacol* 55:199–203, 1999
13. Lindholm A, McEwen J, Riis AP: Improved postprandial glycemic control with insulin aspart: a randomized double-blind cross-over trial in type 1 diabetes. *Diabetes Care* 22:801–805, 1999
14. Brange J, Volund A: Insulin analogs with improved pharmacokinetic profiles. *Adv Drug Deliv Rev* 35:307–335, 1999
15. Bolli GB: Rationale for using combinations of short-acting insulin analogue and NPH insulin at mealtime in the treatment of type 1 diabetes mellitus. *J Pediatr Endocrinol Metab* 12 (Suppl. 3):737–744, 1999
16. Turner HE, Matthews DR: The use of fixed-mixture insulins in clinical practice. *Eur J Clin Pharmacol* 56:19–25, 2000
17. Weyer C, Heise T, Heinemann L: Insulin aspart in a 30/70 premixed formulation: pharmacodynamic properties of a rapid-acting insulin analog in stable mixture. *Diabetes Care* 20:1612–1614, 1997
18. Roach P, Yue L, Arora V: Improved postprandial glycemic control during treatment with Humalog Mix25, a novel protamine-based insulin lispro formulation: Humalog Mix25 Study Group. *Diabetes Care* 22:1258–1261, 1999
19. World Medical Association Declaration of Helsinki: Recommendations guiding physicians in biomedical research involving human subjects. *JAMA* 277:925–926, 1997
20. Heinemann L, Starke AA, Hohmann A, Berger M: Timing between the subcutaneous administration of insulin and consumption of a carbohydrate rich meal. *Horm Metab Res Suppl* 26:137–139, 1992
21. Trinder P: Determination of glucose in blood using glucose oxidase with an alternative oxygen acceptor. *Ann Clin Biochem* 6:24–27, 1969
22. *Human Insulin: Clinical Pharmacological Studies in Normal Man*. Lancaster, England, MTP Press, 1986
23. Andersen L, Volund A, Olsen KJ, Plum A, Walsh D: Validity and use of a non-parallel insulin assay for pharmacokinetic studies of the rapid-acting insulin analogue, insulin aspart. *J Immunoassay Immunochim* 22:147–163, 2001
24. American Diabetes Association: Postprandial blood glucose. *Diabetes Care* 24:775–779, 2001
25. Zinman B: ACE Consensus Conference on Guidelines for Glycemic Control. *Endocr Pract* 8 (Suppl. 1):35–36, 2002
26. Ceriello A: The post-prandial state and cardiovascular disease: relevance to diabetes mellitus. *Diabetes Metab Res Rev* 16: 125–132, 2000
27. Shichiri M, Kishikawa H, Ohkubo Y, Wake N: Long-term results of the Kumamoto Study on optimal diabetes control in type 2 diabetic patients. *Diabetes Care* 23 (Suppl. 2):B21–B29, 2000
28. Jacobsen LV, Sogaard B, Riis A: Pharmacokinetics and pharmacodynamics of a premixed formulation of soluble and protamine-retarded insulin aspart. *Eur J Clin Pharmacol* 56:399–403, 2000
29. Home PD, Boehm BO, Bott U, Behrend C, Kamp NM, Lindholm A: Treatment with premixed insulin aspart 30 in type 1 and type 2 diabetes: a randomized 12-week comparison (Abstract). *Diabetes Res Clin Pract* 50:S37, 2000
